# Supplementary material for: Machine Learning-Based Predictions of Porosity during Cold Spray Deposition of High Entropy Alloy Coatings
Source: MDPI journal article supplement (doi:10.3390/coatings14040404), 2024-03-29
Supplement: s1 [file s1]

### Supplementary file

Table S1. The tuned coefficients and intercept values were obtained from the linear regression model.

| Input feature | Temperature | Pressure | Stand-off distance | Gas   | Type of powder |
|---------------|-------------|----------|--------------------|-------|----------------|
| Coefficients  | −0.73       | −0.16    | 0.39               | −3.39 | 2.18           |
| Intercept     |             |          | 2.42               |       |                |

Table S2. The tuned hyperparameter values for the decision trees model.

| criterion | max_depth | min_sample_split | splitter |
|-----------|-----------|------------------|----------|
| Poisson   | 20        | 2                | random   |

Table S3. The tuned hyperparameter values for the random forests model.

| n_estimator<br>s | criterio<br>n | max_dept<br>h | min_samples_spli<br>t | min_samples_lea<br>f | max_feature<br>s |
|------------------|---------------|---------------|-----------------------|----------------------|------------------|
| 300              | Poisson       | 40            | 2                     | 1                    | None             |

Table S4. The tuned hyperparameter values for the GBOOST model.

| learning<br>rate | max_dept<br>h | max_featur<br>es | min_samples_spl<br>it | min_samples_le<br>af | n_estimator<br>s |
|------------------|---------------|------------------|-----------------------|----------------------|------------------|
| 0.5              | 5             | sqrt             | 2                     | 1                    | 300              |

Table S5. The tuned hyperparameter values for the XGBOOST model.

| Alpha | eta | lambda | max depth | n_estimators | subsample |
|-------|-----|--------|-----------|--------------|-----------|
| 0     | 0.1 | 1      | 10        | 300          | 1         |

Table S6. The tuned hyperparameter values for the SVR\_lin model.

| gamma | epsilon | C |
|-------|---------|---|
| 1     | 0.6     | 1 |

Table S7. The tuned hyperparameter values for the SVR\_poly model.

| gamma | epsilon | C   |
|-------|---------|-----|
| 1     | 1       | 0.5 |

Table S8. The tuned hyperparameter values for the SVR\_rbf model.

| gamma | epsilon | C   |
|-------|---------|-----|
| 1     | 0.3     | 0.5 |

Table S9. The tuned hyperparameter values for the ANN model.

|                                          |                    |
|------------------------------------------|--------------------|
| Number of hidden layers                  | 2                  |
| Number of neurons in hidden layer 1      | 15                 |
| Number of neurons in hidden layer 2      | 6                  |
| Activation function for hidden layer 1   | relu               |
| Activation function for hidden layer 2   | relu               |
| Activation function for the output layer | sigmoid            |
| Optimiser                                | adam               |
| Loss function                            | mean squared error |
